# Supplementary material for: Tunable and selective hydrogenation of furfural to furfuryl alcohol and cyclopentanone over Pt supported on biomass-derived porous heteroatom doped carbon
Source: Royal Society of Chemistry journal article supplement (doi:10.1039/c7fd00041c), 2017-01-01
Supplement: c7fd00041c1.pdf [file c7fd00041c1.pdf]

## Tunable and selective hydrogenation of furfural to furfuryl alcohol and cyclopentanone over Pt supported on biomass-derived porous heteroatom doped carbon

Xiuyun Liu,<sup>ac</sup> Bo Zhang,<sup>ab</sup> Benhua Fei,<sup>b</sup> Xiufang Chen,<sup>\*a</sup> Junyi Zhang,<sup>a</sup> and Xindong Mu<sup>\*a</sup>

*a* Key Laboratory of Bio-based Materials, Qingdao Institute of Bioenergy and Bioprocess Technology, Chinese Academy of Sciences, Qingdao 266101, China. Email: chenxf@qibebt.ac.cn; muxd@qibebt.ac.cn

*b* International Centre for Bamboo and Rattan, Beijing 100102, China

*c* Fujian Provincial Key Laboratory of Ecology-Toxicological Effects & Control for Emerging Contaminants, Putian University, Fujian 351100, China

The conversion of furfural, the yield and selectivity of products are calculated according to the equations as following:

$$\text{FFA conversion (\%)} = \frac{n_{\text{FFA}}^{\text{in}} - n_{\text{FFA}}^{\text{det}}}{n_{\text{FFA}}^{\text{in}}} \times 100 \quad (1)$$

$$\text{FA yield (\%)} = \frac{n_{\text{FA}}^{\text{det}}}{n_{\text{FFA}}^{\text{in}}} \times 100 \quad (2)$$

$$\text{FA selectivity (\%)} = \frac{n_{\text{FA}}^{\text{det}}}{n_{\text{FFA}}^{\text{in}} - n_{\text{FFA}}^{\text{det}}} \times 100 \quad (3)$$

$$\text{CPO yield (\%)} = \frac{n_{\text{CPO}}^{\text{det}}}{n_{\text{FFA}}^{\text{in}}} \times 100 \quad (4)$$

$$\text{CPO selectivity (\%)} = \frac{n_{\text{CPO}}^{\text{det}}}{n_{\text{FFA}}^{\text{in}} - n_{\text{FFA}}^{\text{det}}} \times 100 \quad (5)$$

$$\text{CPL yield (\%)} = \frac{n_{\text{CPL}}^{\text{det}}}{n_{\text{FFA}}^{\text{in}}} \times 100 \quad (6)$$

$$\text{CPL selectivity (\%)} = \frac{n_{\text{CPL}}^{\text{det}}}{n_{\text{FFA}}^{\text{in}} - n_{\text{FFA}}^{\text{det}}} \times 100 \quad (7)$$

where  $n^{\text{in}}$  means the initial amount of reactant added into the reactor,  $n^{\text{det}}$  means the amount of products detected after reaction.

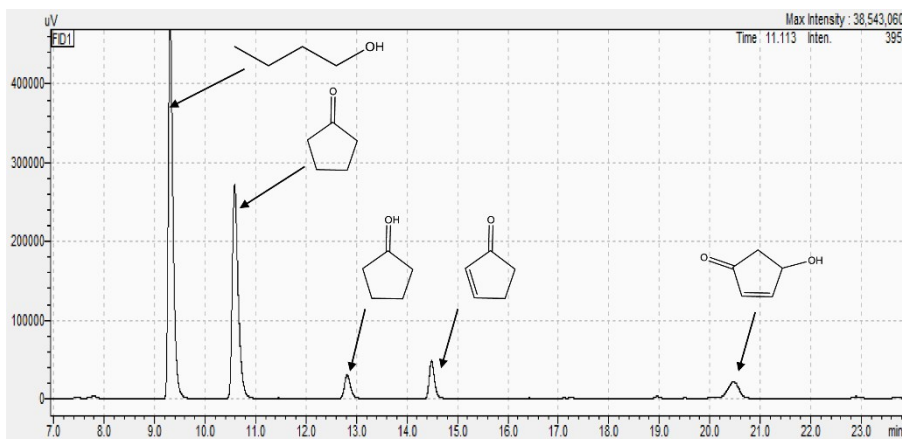

**Fig. S1** Representative GC spectrums of furfural hydrogenation in water.

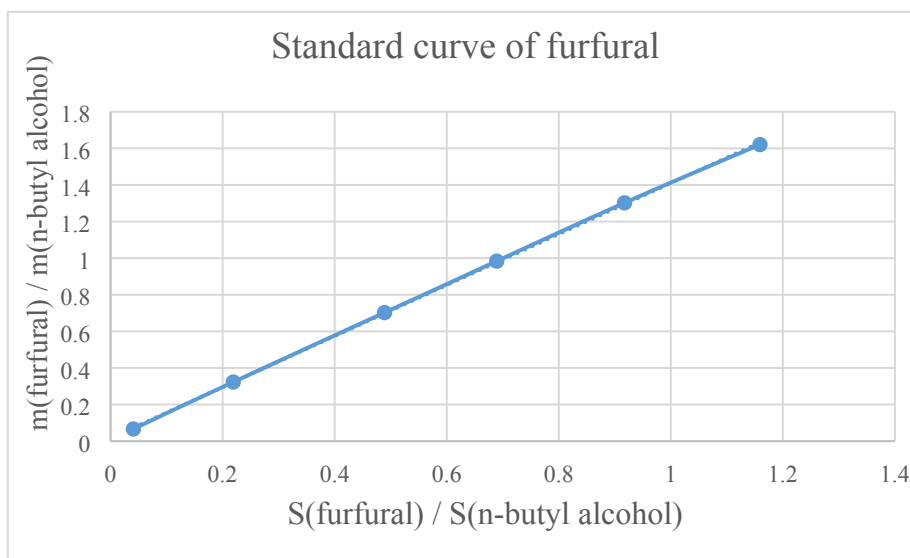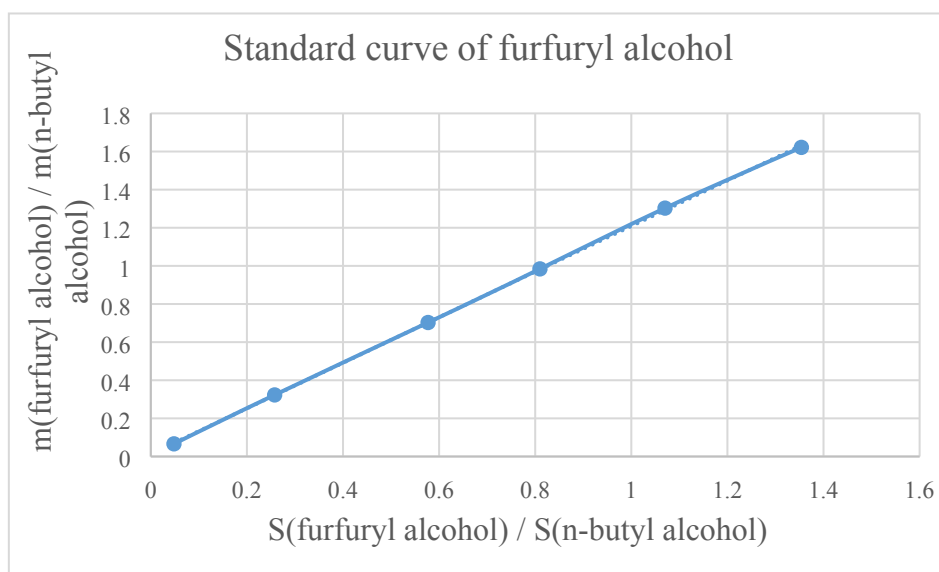

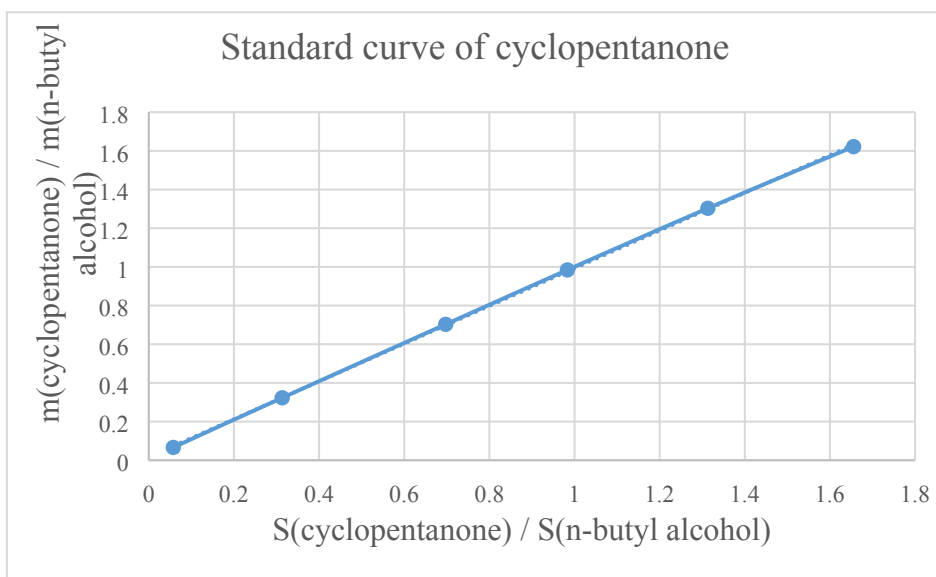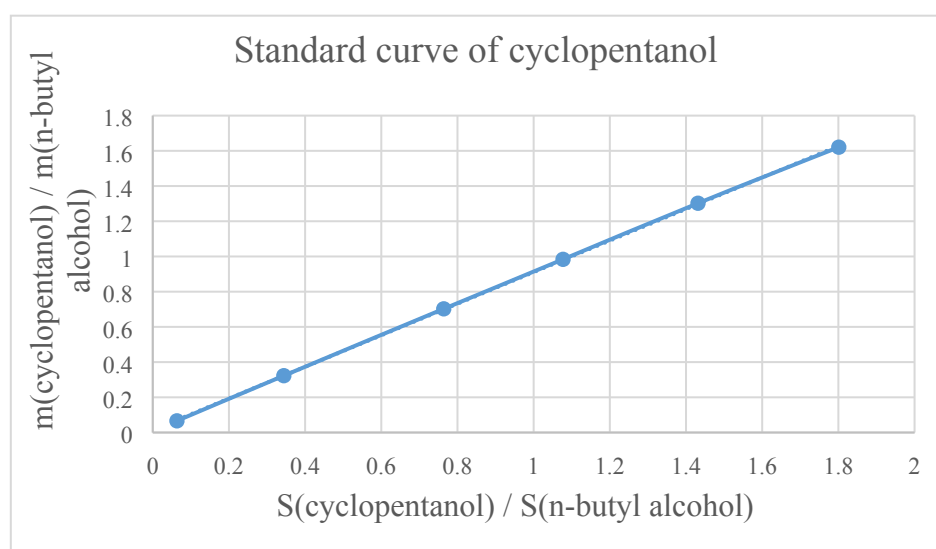

**Fig. S2** Standard curve of furfural with n-butyl alcohol and furfuryl alcohol , cyclopentanone, cyclopentanol with n-butyl alcohol.

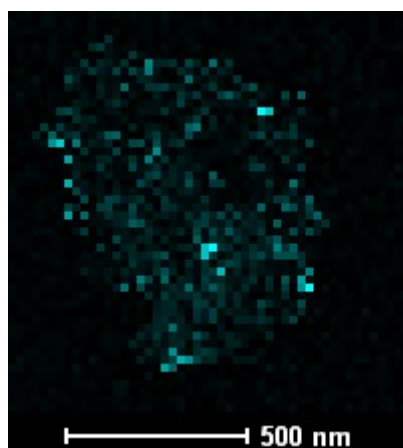

**Fig. S3** Pt STEM mapping images of Pt/NC-BS-800.
